# Supplementary material
Source: MDPI journal article supplement (https://www.mdpi.com/2072-4292/12/21/3491)
Supplement: s1 [file s1]

# Influence of Urban Scale and Urban Expansion on the Urban Heat Island Effect in Metropolitan Areas: Case Study of Beijing–Tianjin–Hebei Urban Agglomeration

Mingxing Chen <sup>1,2,3</sup>, Yuan Zhou <sup>1,2,3</sup>, Maogui Hu <sup>1,4,\*</sup> and Yaliu Zhou <sup>5</sup>

<sup>1</sup> Institute of Geographic Sciences and Natural Resources Research, CAS; 11A, Datun Road, Chaoyang District, Beijing 100101, China; chenmx@igsnr.ac.cn (M.C.); zhouy.19b@igsnr.ac.cn (Y.Z.)

<sup>2</sup> Key Laboratory of Regional Sustainable Development Modeling, CAS

<sup>3</sup> College of Resource and Environment, University of Chinese Academy of Sciences

<sup>4</sup> State Key Laboratory of Resources and Environmental Information System

<sup>5</sup> School of Geographic Sciences, East China Normal University; 10173901232@stu.ecnu.edu.cn

\* Correspondence: humg@lreis.ac.cn

**Table S1.** Classification system of land use from RESDC, CAS.

| First classification | Secondary classification | Number |
|----------------------|--------------------------|--------|
| farmland             | paddy land               | 11     |
|                      | dry land                 | 12     |
| forest               | forest land              | 21     |
|                      | bush                     | 22     |
|                      | open forest land         | 23     |
|                      | other woodland           | 24     |
| grassland            | high coverage grass      | 31     |
|                      | medium coverage grass    | 32     |
|                      | low coverage grass       | 33     |
| water                | graff                    | 41     |
|                      | lakes                    | 42     |
|                      | reservoir pits           | 43     |
|                      | tidal flats              | 44     |
|                      | beaches                  | 45     |
|                      | bottomland               | 46     |
| built-up land        | urban land use           | 51     |
|                      | rural residential areas  | 52     |
|                      | other construction land  | 53     |
| unused land          | sand                     | 61     |
|                      | saline-alkali land       | 62     |
|                      | marsh                    | 63     |
|                      | wetland                  | 64     |
|                      | bare land                | 65     |
|                      | bare rock                | 66     |
|                      | others                   | 67     |
| ocean                | ocean                    | 99     |

**Table S2.** Temperature difference of each part based on Equation (2).

| Region   | 2000         | 2005         | 2010         | 2015         |
|----------|--------------|--------------|--------------|--------------|
| Northern | −15.3–5.2 °C | −14.8–4.6 °C | −13.8–4.5 °C | −15.4–5.4 °C |
| Central  | −10.8–5.7 °C | −10.5–4.7 °C | −10.2–4.7 °C | −12.0–8.9 °C |
| Southern | −10.7–5.2 °C | −11.0–4.8 °C | −11.6–4.6 °C | −12.2–5.2 °C |

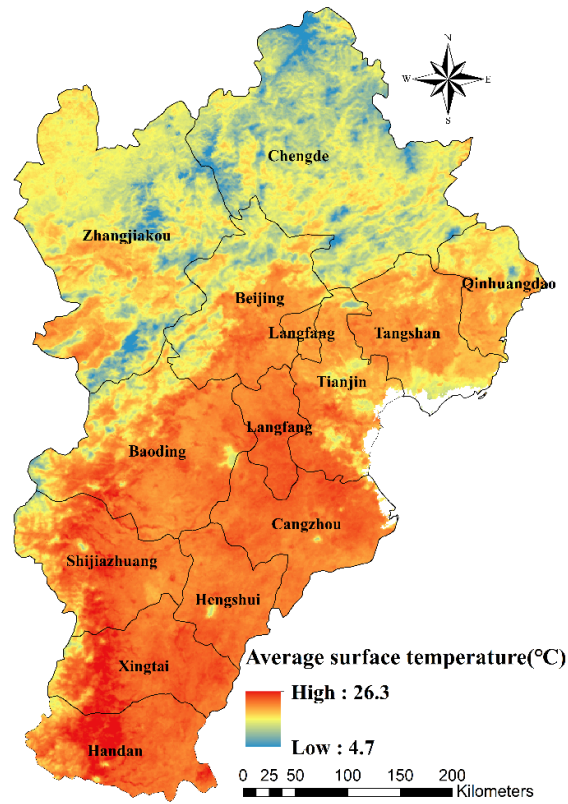

**Figure S1.** Average surface temperature during the period 2000–2015 of Beijing-Tianjin-Hebei region. The highest temperature is 26.3 °C, and the lowest temperature is 4.7 °C. The temperature in southeastern part with mainly plain is higher than in northwestern part with mainly mountains.

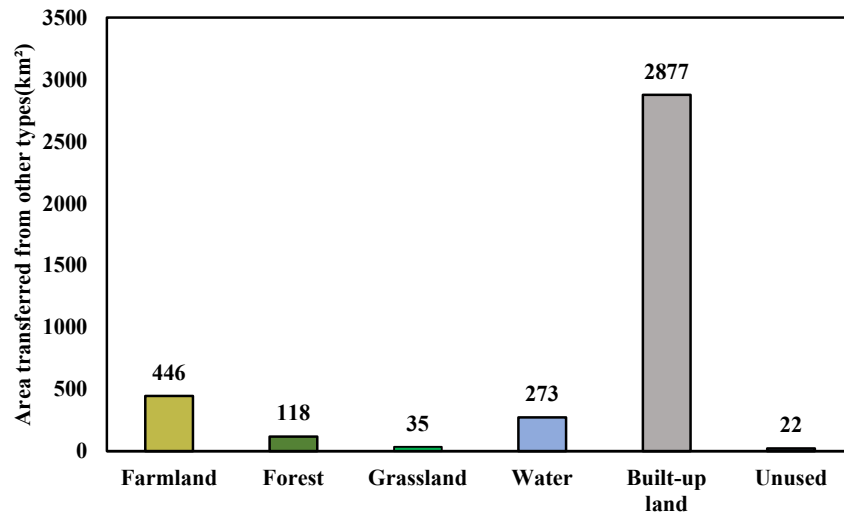

**Figure S2.** Areas of lands that transferred to farmland, forest, grassland, water, built-up land and unused land. The area that transferred to built-up land is far more than other land use types, indicating the rapid expansion of urban land occurred during 2000–2015 in Beijing-Tianjin-Hebei region .

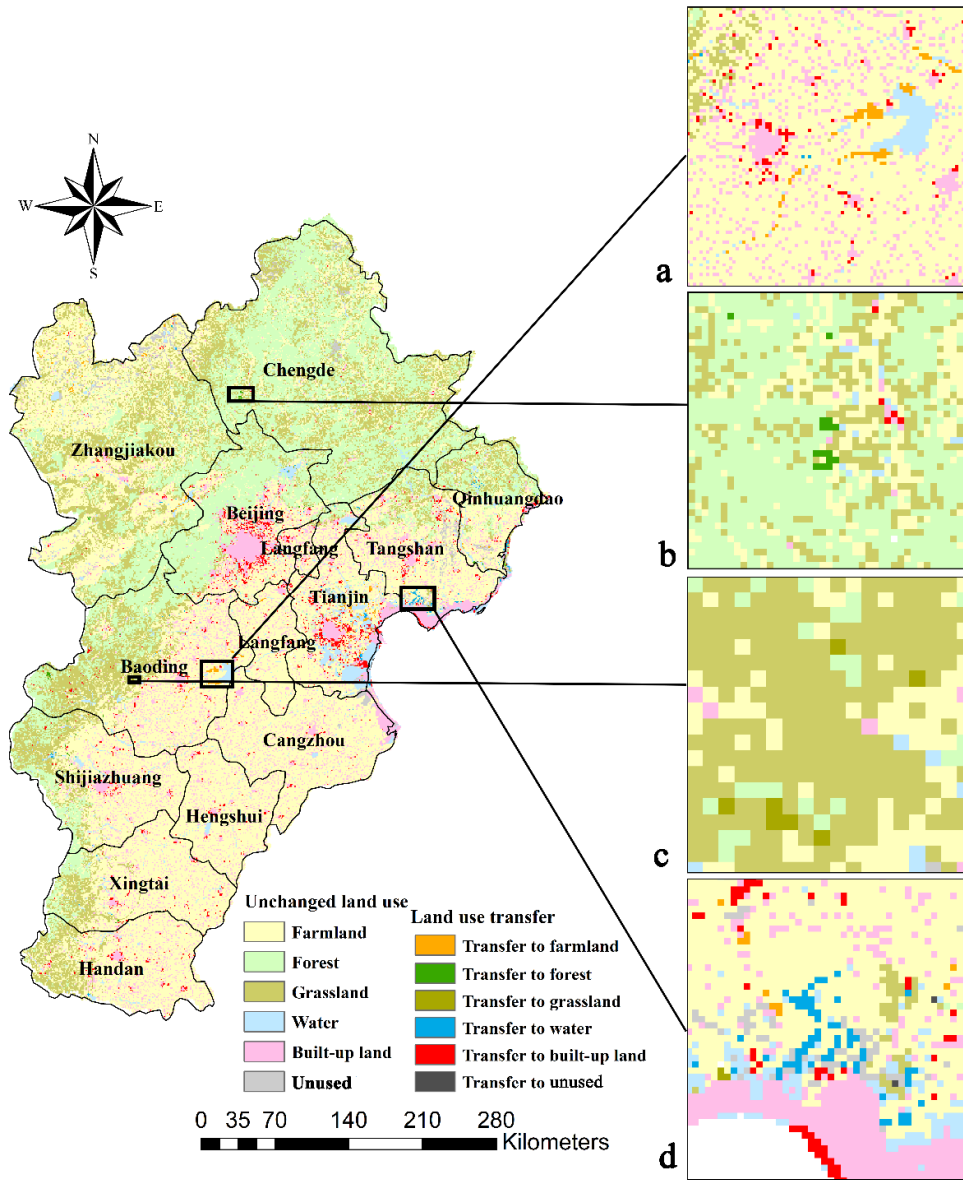

**Figure S3.** Spatial distribution of lands that transferred to farmland, forest, grassland, water, built-up land, and unused land. According to Figure S2, the area that transferred to land use types except built-up land is relatively small. The lands that transferred to farmland, forest, grassland, water, and unused land compared with built-up land is scattered.

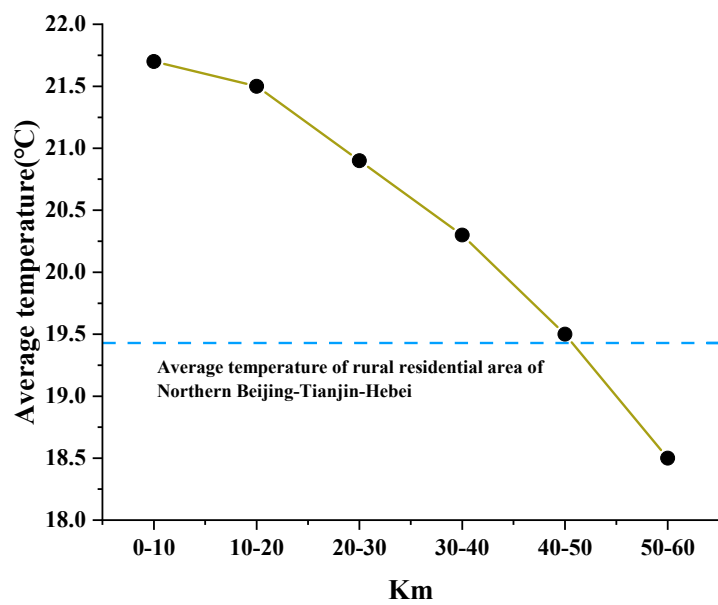

Beijing.

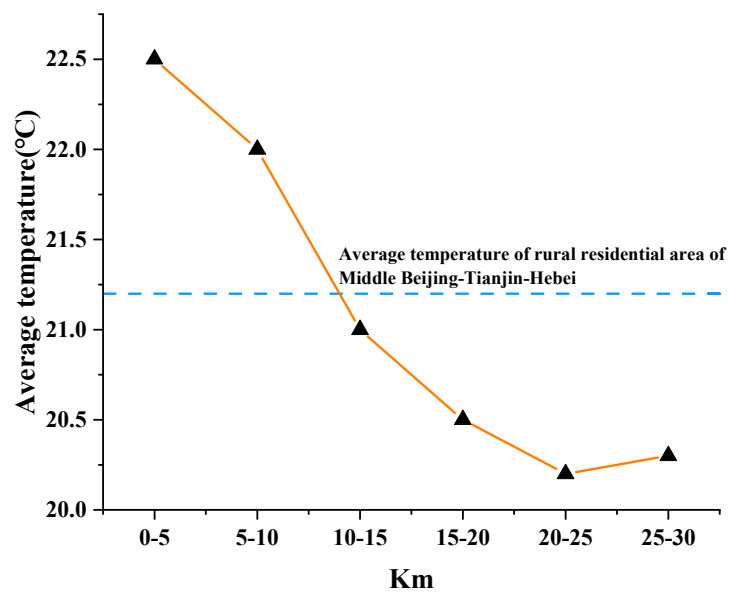

Tianjin

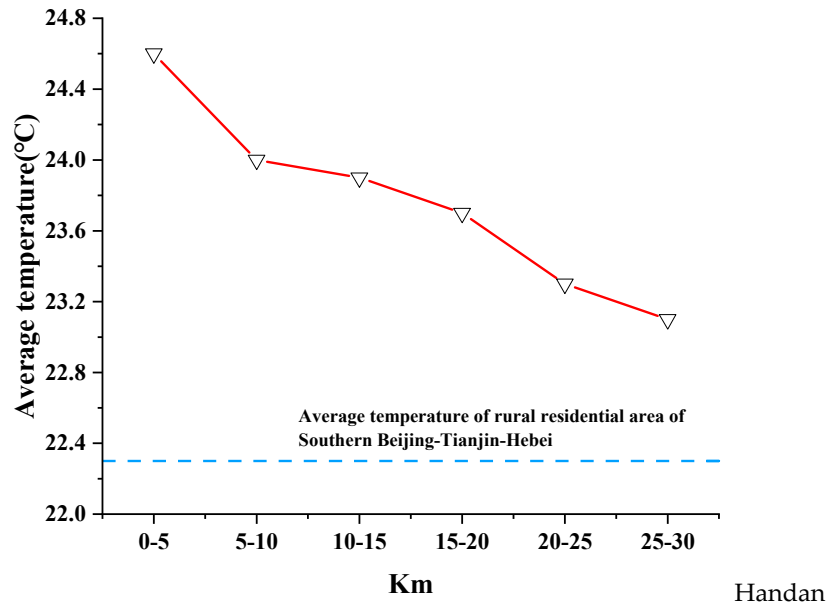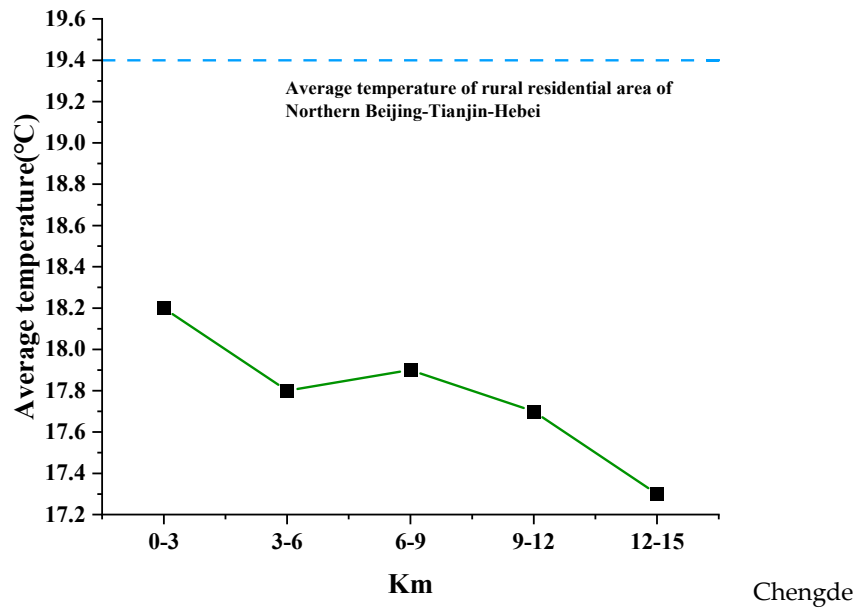

**Figure S4.** Average temperature of different circle and the comparison of that with rural residential areas. The y-axis is the average surface temperature of each city during 2000–2015, and the x-axis is the distance from the city center. Full line and dotted line are the average surface temperature value and the rural comparison value, respectively. The part below the dotted line of full line referring the area without heat island.
